# Supplementary material for: Thermal-Driven Formation of Silver Clusters Inside Na/Li FAUY Zeolites for Formaldehyde Detection
Source: MDPI journal article supplement (doi:10.3390/nano12183215), 2022-09-16
Supplement: s1 [file s1]

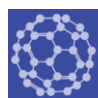

Supplementary Materials

# Thermal-Driven Formation of Silver Clusters Inside Na/Li FAUY Zeolites for Formaldehyde Detection

Jianzhong Yu, Song Ye \*, Xinling Xu, Ling Pan, Peixuan Lin, Huazhen Liao and Deping Wang

School of Materials Science and Engineering, Tongji University, Shanghai 201804, China

\* Correspondence: yesong@tongji.edu.cn

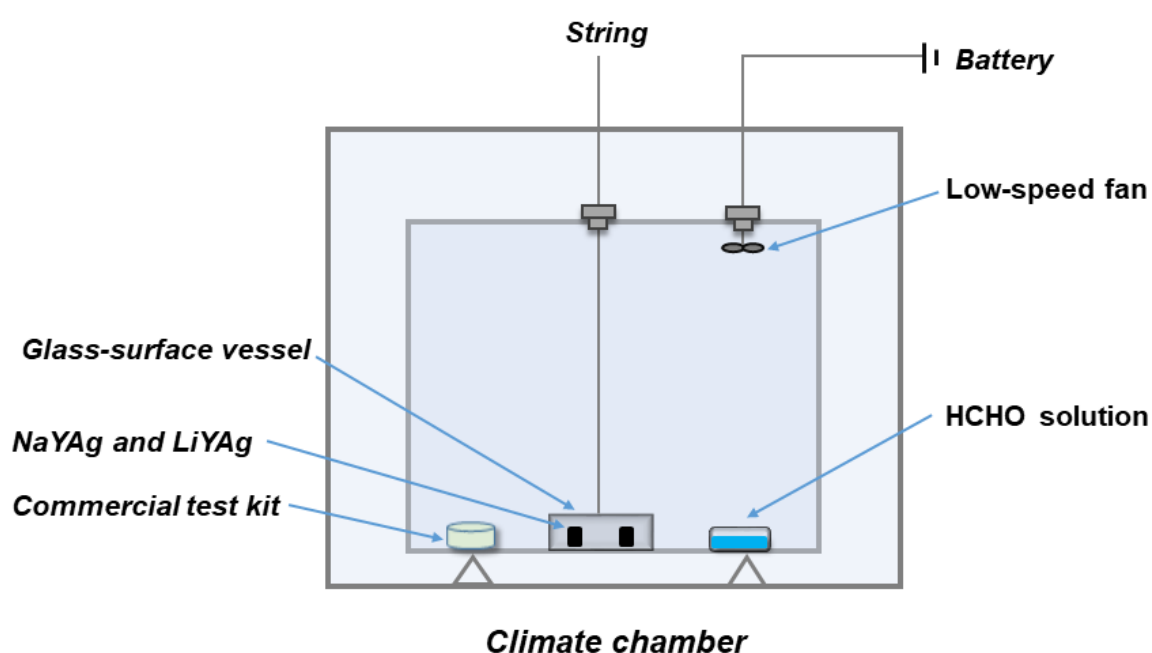**Figure S1.** Schematic diagram of experimental installation for the detection of formaldehyde gas.**Table S1.** Binding energies and Auger parameters of Ag in NaYAg and LiYAg.

| Sample | Binding Energy<br>Ag 3d <sub>5/2</sub> (eV) | Kinetic Energy<br>Ag M <sub>4</sub> N <sub>45</sub> N <sub>45</sub> (eV) | Auger Parameter<br>(eV) |
|--------|---------------------------------------------|--------------------------------------------------------------------------|-------------------------|
| LiYAg  | 368.9                                       | 353.4                                                                    | 722.3                   |
| NaYAg  | 368.9                                       | 353.6                                                                    | 722.5                   |

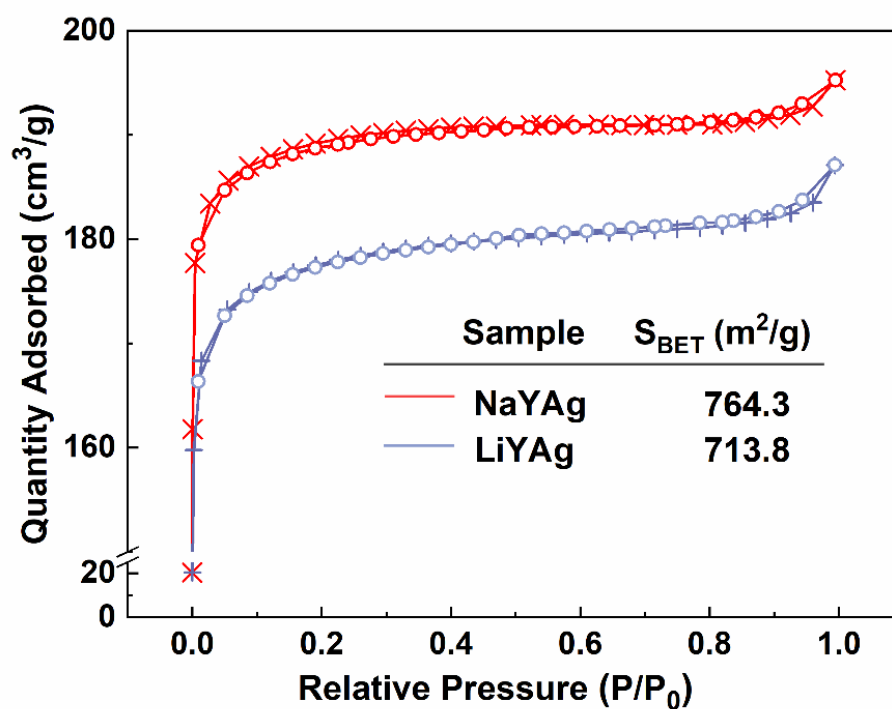

**Figure S2.**  $\text{N}_2$  adsorption-desorption isotherms of NaYAg and LiYAg and the corresponding BET surface area.

**Table S2.** Binding energies and Auger Parameters of Ag MNN in NaYAg and LiYAg before and after exposing to air and different contents of formaldehyde atmosphere.

| Sample       | Binding Energy<br>Ag $3d_{5/2}$ (eV) | Kinetic Energy<br>Ag $M_{45}N_{45}N_{45}$ (eV) | Auger Parameter<br>Ag $3d_{5/2}+M_{45}N_{45}N_{45}$ (eV) |
|--------------|--------------------------------------|------------------------------------------------|----------------------------------------------------------|
| LiYAg        | 368.9                                | 353.4                                          | 722.3                                                    |
| LiYAg-0.05   | 368.9                                | 353.3                                          | 722.2                                                    |
| LiYAg-0.40   | 368.9                                | 353.1                                          | 722.0                                                    |
| LiYAg-Excess | 368.8                                | 353.4                                          | 722.2                                                    |
| NaYAg        | 368.9                                | 353.6                                          | 722.5                                                    |
| NaYAg-0.05   | 368.9                                | 353.1                                          | 722.0                                                    |
| NaYAg-0.40   | 368.9                                | 353.2                                          | 722.1                                                    |
| NaYAg-Excess | 369.0                                | 353.4                                          | 722.3                                                    |
